# Supplementary material for: hMRAPα, but Not hMRAP2, Enhances hMC4R Constitutive Activity in HEK293 Cells and This Is Not Dependent on hMRAPα Induced Changes in hMC4R Complex N-linked Glycosylation
Source: PubMed Central journal article supplement (PMC4607451; doi:10.1371/journal.pone.0140320), 2015-10-15
Supplement: pone.0140320.s001.pdf [file pone.0140320.s001.pdf]

| <b>Construct</b>         | <b>Purpose for developing construct</b>                                                                                     | <b>Outcome</b>                                                                                            |
|--------------------------|-----------------------------------------------------------------------------------------------------------------------------|-----------------------------------------------------------------------------------------------------------|
| hMRAP $\alpha$           | Functional comparison of untagged and tagged hMRAP $\alpha$                                                                 | Good for functional testing                                                                               |
| hMRAP $\alpha$ -FLAG     | Fixed confocal microscopy analysis of hMRAP $\alpha$ subcellular localisation                                               | Good for functional testing and fixed confocal microscopy                                                 |
| hMRAP $\alpha$ -FLAG-FLN | Fixed confocal microscopy to determine that hMRAP $\alpha$ -FLN subcellular localisation is similar to hMRAP $\alpha$ -FLAG | Good for fixed confocal microscopy                                                                        |
| hMRAP $\alpha$ -FLN      | Dual biarsenical imaging of hMRAP $\alpha$ and hMC4R                                                                        | Good for functional testing but not for biarsenical imaging                                               |
| hMC4R                    | Functional comparison of untagged and tagged hMC4R                                                                          | Good for functional testing                                                                               |
| HA-hMC4R                 | Fixed confocal microscopy analysis of hMC4R subcellular localisation                                                        | Good for functional testing and fixed confocal microscopy                                                 |
| hMC4R-PG                 | Dual biarsenical imaging of hMC4R and hMRAP $\alpha$                                                                        | Not good for functional testing nor for biarsenical imaging                                               |
| hMC4R-eGFP               | Live cell imaging of hMC4R                                                                                                  | Good for functional testing and live cell imaging although subcellular localisation differs from HA-hMC4R |
| eGFP-hMC4R               | Live cell imaging of hMC4R                                                                                                  | Not good for functional testing                                                                           |

**S1 Table:** Summary of constructs, their purpose and outcomes of functional testing.
